# Supplementary material
Source: publisher figshare collection journal article supplement (https://geolsoc.figshare.com/ndownloader/files/12296792)
Supplement: Supplementary file 1 [file 12296792]

## Sheet: Olivine
Table 1. Representative microprobe analyses of olivine in the Aladag peridotites and chromitites
Lithology	Analysis No.	SiO2	TiO2	Al2O3	Cr2O3	FeO	MnO	MgO	NiO	CaO	K2O	Na2O	Total	Fo
Harzburgite	3-3-1	41.276	b.d.	0.038	0.039	8.55	0.103	50.425	0.344	0.013	b.d.	0.013	100.801	91.22
	3-3-2	39.884	0.016	b.d.	b.d.	8.547	0.127	50.425	0.398	0.023	0.008	0.03	99.462	91.2
	3-4-3	41.89	b.d.	b.d.	0.059	7.577	0.102	49.894	0.393	b.d.	0.005	b.d.	99.92	92.05
	3-4-6	41.227	b.d.	b.d.	0.025	7.977	0.166	49.773	0.41	0.02	b.d.	b.d.	99.6	91.59
	3-5-6	41.181	b.d.	b.d.	0.039	8.196	0.126	49.495	0.342	0.011	0.023	b.d.	99.417	91.38
	3-6-2	41.439	b.d.	b.d.	0.012	8.129	0.106	49.513	0.431	0.032	0.009	b.d.	99.671	91.46
	3-6-6	41.437	b.d.	b.d.	b.d.	7.836	0.116	49.488	0.414	b.d.	b.d.	b.d.	99.295	91.73
	3-7-3	41.011	b.d.	b.d.	0.009	7.872	0.123	49.601	0.402	0.007	0.008	b.d.	99.033	91.71
	3-7-12	41.32	b.d.	b.d.	0.037	7.375	0.107	50.12	0.44	0.011	b.d.	0.013	99.427	92.27
	3-8-4	41.381	b.d.	0.006	b.d.	8.51	0.14	50.127	0.433	0.017	b.d.	b.d.	100.614	91.17
	3-8-6	40.446	0.005	0.011	b.d.	8.491	0.137	50.607	0.384	0.01	b.d.	b.d.	100.091	91.27
Mantle dunite	3-9-2	41.266	b.d.	0.009	0.019	8.299	0.115	48.943	0.284	0.084	0.008	0.01	99.04	91.2
	3-9-6	41.23	b.d.	0.155	0.132	8.855	0.099	48.811	0.27	0.079	b.d.	b.d.	99.631	90.67
	3-10-2	41.289	b.d.	b.d.	0.024	9.095	0.14	48.892	0.254	0.058	0.006	b.d.	99.758	90.42
	3-10-4	41.552	0.012	b.d.	0.017	8.38	0.116	49.074	0.287	0.06	b.d.	0.005	99.507	91.15
	3-10-7	41.423	0.03	0.022	0.02	8.841	0.148	48.918	0.3	0.09	b.d.	b.d.	99.792	90.65
MTZ chromitite	1-3-2	41.436	b.d.	b.d.	b.d.	6.314	0.126	51.706	0.357	0.012	b.d.	0.006	99.959	93.47
	1-3-6	41.968	b.d.	b.d.	b.d.	5.989	0.093	51.434	0.349	0.078	b.d.	b.d.	99.911	93.78
	1-3-8	42.045	0.005	b.d.	b.d.	6.26	0.115	51.255	0.342	0.063	0.012	b.d.	100.099	93.48
	2-6-1	41.433	0.011	0.005	b.d.	7.57	0.075	50.81	0.361	0.08	b.d.	0.026	100.371	92.22
	2-6-2	40.172	b.d.	0.006	0.087	7.309	0.155	51.421	0.333	0.112	b.d.	b.d.	99.595	92.47
	2-6-4	40.379	b.d.	b.d.	b.d.	7.371	0.13	51.039	0.366	0.095	0.008	b.d.	99.388	92.38
Mantle chromitite	15-17-1	42.12	b.d.	0.03	0.86	2.71	0.06	52.71	0.64	0.02	b.d.	b.d.	99.18	97.2
	15-17-1R	42.22	0.06	0.03	0.75	2.86	0.02	53.13	0.59	b.d.	0.03	b.d.	99.87	97
